# Supplementary material for: Co-transport of polybromodiphenyl ethers and soil nanoparticles in saturated porous media: implications for the risks of polybromodiphenyl ether spreading in groundwater
Source: Royal Society of Chemistry journal article supplement (doi:10.1039/d4en00086b), 2024-01-01
Supplement: d4en00086b1.pdf [file d4en00086b1.pdf]

Supplementary Information

**Co-Transport of Polybromodiphenyl Ethers and Soil  
Nanoparticles in Saturated Porous Media: Implications for the  
Risks of Polybromodiphenyl Ether Spreading in Groundwaters**

Jiameng Liu, Tianchi Cao\*, Lin Duan, Shengkai Xu, Min Li, Tong Zhang\*, and Wei Chen\*

College of Environmental Science and Engineering, Ministry of Education Key Laboratory of  
Pollution Processes and Environmental Criteria, Tianjin Key Laboratory of Environmental  
Remediation and Pollution Control, Nankai University, Tianjin 300350, China

\* Corresponding authors:

(E-mail) [tianchi.cao@nankai.edu.cn](mailto:tianchi.cao@nankai.edu.cn); [zhangtong@nankai.edu.cn](mailto:zhangtong@nankai.edu.cn); [chenwei@nankai.edu.cn](mailto:chenwei@nankai.edu.cn)

Manuscript prepared for *Environmental Science: Nano*

Number of pages: 12

Number of tables: 7

Number of figures: 4

**Table S1.** Protocols of column experiments.

| Column no. <sup>a</sup> | Background solution | Type of soil nanoparticles | Type of porous media | Ionic strength (mM) | Length (cm) | Bulk density (g/cm <sup>3</sup> ) | Porosity <sup>b</sup> (-) | Pore-water Velocity (m/d) | Soil nanoparticles conc.(mg/L) |
|-------------------------|---------------------|----------------------------|----------------------|---------------------|-------------|-----------------------------------|---------------------------|---------------------------|--------------------------------|
| 1                       | GW                  | BLK                        | Quartz sand          | 3.78                | 18.0        | 1.49                              | 0.44                      | 10                        | 106.8                          |
| 1#                      | GW                  | BLK                        | Quartz sand          | 3.78                | 18.0        | 1.49                              | 0.44                      | 10                        | 107.0                          |
| 2                       | GW                  | PUR                        | Quartz sand          | 3.78                | 18.4        | 1.46                              | 0.45                      | 10                        | 101.7                          |
| 2#                      | GW                  | PUR                        | Quartz sand          | 3.78                | 18.4        | 1.46                              | 0.45                      | 10                        | 102.3                          |
| 3                       | GW                  | LOS                        | Quartz sand          | 3.78                | 18.0        | 1.49                              | 0.44                      | 10                        | 104.0                          |
| 3#                      | GW                  | LOS                        | Quartz sand          | 3.78                | 18.0        | 1.49                              | 0.44                      | 10                        | 104.3                          |
| 4                       | GW                  | BLK                        | HA-coated sand       | 3.78                | 17.8        | 1.51                              | 0.43                      | 10                        | 106.1                          |
| 4#                      | GW                  | BLK                        | HA-coated sand       | 3.78                | 17.8        | 1.51                              | 0.43                      | 10                        | 102.7                          |
| 5                       | GW                  | PUR                        | HA-coated sand       | 3.78                | 18.3        | 1.47                              | 0.45                      | 10                        | 103.9                          |
| 5#                      | GW                  | PUR                        | HA-coated sand       | 3.78                | 18.3        | 1.47                              | 0.45                      | 10                        | 104.5                          |
| 6                       | GW                  | LOS                        | HA-coated sand       | 3.78                | 18.0        | 1.49                              | 0.44                      | 10                        | 104.9                          |
| 6#                      | GW                  | LOS                        | HA-coated sand       | 3.78                | 18.0        | 1.49                              | 0.44                      | 10                        | 104.3                          |
| 7                       | GW                  | BLK                        | Goethite-coated sand | 3.78                | 18.4        | 1.46                              | 0.45                      | 10                        | 100.7                          |
| 7#                      | GW                  | BLK                        | Goethite-coated sand | 3.78                | 18.1        | 1.48                              | 0.44                      | 10                        | 100.4                          |
| 8                       | GW                  | PUR                        | Goethite-coated sand | 3.78                | 18.3        | 1.47                              | 0.45                      | 10                        | 101.3                          |
| 8#                      | GW                  | PUR                        | Goethite-coated sand | 3.78                | 18.5        | 1.45                              | 0.45                      | 10                        | 100.6                          |
| 9                       | GW                  | LOS                        | Goethite-coated sand | 3.78                | 18.9        | 1.42                              | 0.46                      | 10                        | 101.8                          |
| 9#                      | GW                  | LOS                        | Goethite-coated sand | 3.78                | 19.1        | 1.40                              | 0.47                      | 10                        | 102.0                          |

<sup>a</sup> The symbol # indicates that the column is the respective replicate of the column indicated by the numerical number.

<sup>b</sup> Porosity = (column volume - mass of sand/density of sand)/column volume.

**Table S2.** Recipe of artificial groundwater (GW).

| Ions                          | Concentration (mM) |
|-------------------------------|--------------------|
| HCO <sub>3</sub> <sup>-</sup> | 0.43               |
| SO <sub>4</sub> <sup>2-</sup> | 0.39               |
| NO <sub>3</sub> <sup>-</sup>  | 0.62               |
| Cl <sup>-</sup>               | 0.64               |
| Ca <sup>2+</sup>              | 0.68               |
| Mg <sup>2+</sup>              | 0.24               |
| Na <sup>+</sup>               | 0.43               |
| K <sup>+</sup>                | 0.20               |

**Table S3.** Selected properties of soil nanoparticles in the influents.

| Column no. <sup>a</sup> | Type of soil nanoparticles | Type of porous media | Background solution | pH  | $D_h$ <sup>b</sup> (nm) | PDI <sup>b</sup> | $\zeta$ potential (mV) | $d_p/d_c$ <sup>c</sup> |
|-------------------------|----------------------------|----------------------|---------------------|-----|-------------------------|------------------|------------------------|------------------------|
| 1                       | BLK                        | Quartz sand          | GW                  | 7.5 | 426.2 ± 14.2            | 0.18             | -13.4 ± 0.4            | 0.0016                 |
| 1#                      | BLK                        | Quartz sand          | GW                  | 7.6 | 434.3 ± 18.8            | 0.15             | -13.3 ± 0.3            | 0.0017                 |
| 2                       | PUR                        | Quartz sand          | GW                  | 7.6 | 566.4 ± 10.2            | 0.15             | -13.8 ± 0.4            | 0.0022                 |
| 2#                      | PUR                        | Quartz sand          | GW                  | 7.6 | 578.1 ± 20.3            | 0.19             | -13.7 ± 0.4            | 0.0022                 |
| 3                       | LOS                        | Quartz sand          | GW                  | 7.5 | 381.0 ± 15.6            | 0.17             | -13.7 ± 0.3            | 0.0015                 |
| 3#                      | LOS                        | Quartz sand          | GW                  | 7.6 | 364.0 ± 12.8            | 0.20             | -13.8 ± 0.3            | 0.0014                 |
| 4                       | BLK                        | HA-coated sand       | GW                  | 7.3 | 425.6 ± 19.8            | 0.18             | -12.7 ± 0.4            | 0.0016                 |
| 4#                      | BLK                        | HA-coated sand       | GW                  | 7.6 | 420.1 ± 19.7            | 0.22             | -12.8 ± 0.4            | 0.0016                 |
| 5                       | PUR                        | HA-coated sand       | GW                  | 7.5 | 608.8 ± 18.4            | 0.17             | -13.5 ± 0.5            | 0.0023                 |
| 5#                      | PUR                        | HA-coated sand       | GW                  | 7.6 | 595.4 ± 10.2            | 0.15             | -13.5 ± 0.4            | 0.0023                 |
| 6                       | LOS                        | HA-coated sand       | GW                  | 7.4 | 408.1 ± 12.8            | 0.15             | -13.8 ± 0.3            | 0.0016                 |
| 6#                      | LOS                        | HA-coated sand       | GW                  | 7.6 | 404.1 ± 18.1            | 0.16             | -13.6 ± 0.3            | 0.0016                 |
| 7                       | BLK                        | Goethite-coated sand | GW                  | 7.6 | 519.8 ± 14.1            | 0.20             | -12.8 ± 0.4            | 0.0020                 |
| 7#                      | BLK                        | Goethite-coated sand | GW                  | 7.6 | 544.1 ± 8.2             | 0.22             | -12.7 ± 0.3            | 0.0021                 |
| 8                       | PUR                        | Goethite-coated sand | GW                  | 7.3 | 659.9 ± 13.3            | 0.18             | -13.9 ± 0.3            | 0.0025                 |
| 8#                      | PUR                        | Goethite-coated sand | GW                  | 7.6 | 628.3 ± 25.3            | 0.18             | -13.4 ± 0.4            | 0.0024                 |
| 9                       | LOS                        | Goethite-coated sand | GW                  | 7.5 | 412.2 ± 18.0            | 0.22             | -14.1 ± 0.4            | 0.0016                 |
| 9#                      | LOS                        | Goethite-coated sand | GW                  | 7.6 | 418.2 ± 6.5             | 0.16             | -13.8 ± 0.3            | 0.0016                 |

<sup>a</sup> The symbol # indicates that the column is the replicate of the column indicated by the numerical number.

<sup>b</sup> Hydrodynamic diameter ( $D_h$ ) was determined based on dynamic light scattering analysis and PDI is the polydispersity index of hydrodynamic diameter.

<sup>c</sup>  $d_p/d_c$  represents the ratio of  $D_h$  to average diameter of sand grains.

**Table S4.** Mass balance data of soil nanoparticles in column experiments.

| Column no. <sup>a</sup> | Type of soil nanoparticles | Type of porous media | Effluent Mass <sup>b</sup> (%) | Recovered mass <sup>c</sup> (%) | Mass balance <sup>d</sup> (%) |
|-------------------------|----------------------------|----------------------|--------------------------------|---------------------------------|-------------------------------|
| 1                       | BLK                        | Quartz sand          | 67.6                           | 25.3                            | 92.9                          |
| 1#                      | BLK                        | Quartz sand          | 63.6                           | 25.6                            | 89.2                          |
| 2                       | PUR                        | Quartz sand          | 52.0                           | 38.0                            | 90.0                          |
| 2#                      | PUR                        | Quartz sand          | 46.1                           | 42.7                            | 88.9                          |
| 3                       | LOS                        | Quartz sand          | 17.5                           | 75.0                            | 92.5                          |
| 3#                      | LOS                        | Quartz sand          | 14.9                           | 68.7                            | 83.5                          |
| 4                       | BLK                        | HA-coated sand       | 84.9                           | 5.4                             | 90.3                          |
| 4#                      | BLK                        | HA-coated sand       | 88.8                           | 5.4                             | 94.2                          |
| 5                       | PUR                        | HA-coated sand       | 77.6                           | 18.3                            | 95.9                          |
| 5#                      | PUR                        | HA-coated sand       | 76.6                           | 19.2                            | 95.8                          |
| 6                       | LOS                        | HA-coated sand       | 54.7                           | 37.3                            | 92.1                          |
| 6#                      | LOS                        | HA-coated sand       | 53.1                           | 39.8                            | 92.8                          |
| 7                       | BLK                        | Goethite-coated sand | 11.0                           | 76.6                            | 87.6                          |
| 7#                      | BLK                        | Goethite-coated sand | 13.5                           | 70.6                            | 84.0                          |
| 8                       | PUR                        | Goethite-coated sand | 10.8                           | 99.2                            | 110.0                         |
| 8#                      | PUR                        | Goethite-coated sand | 12.0                           | 101.8                           | 113.8                         |
| 9                       | LOS                        | Goethite-coated sand | 2.5                            | 86.0                            | 88.6                          |
| 9#                      | LOS                        | Goethite-coated sand | 2.2                            | 91.4                            | 93.5                          |

<sup>a</sup> The symbol # indicates that the column is the replicate of the column indicated by the numerical number.

<sup>b</sup> Effluent mass was the percentage of soil nanoparticles passed through columns.

<sup>c</sup> Recovered mass was the percentage of soil nanoparticles recovered from columns.

<sup>d</sup> Mass balance was calculated as: effluent mass + recovered mass.

**Table S5.** Mass balance data of BDE-209 in column experiments.

| Column no. <sup>a</sup> | Type of soil nanoparticles | Type of porous media | Effluent Mass <sup>b</sup> (%) | Recovered mass <sup>c</sup> (%) | Mass balance <sup>d</sup> (%) |
|-------------------------|----------------------------|----------------------|--------------------------------|---------------------------------|-------------------------------|
| 1                       | BLK                        | Quartz sand          | 67.6                           | 19.7                            | 87.4                          |
| 1#                      | BLK                        | Quartz sand          | 63.6                           | 20.2                            | 83.7                          |
| 2                       | PUR                        | Quartz sand          | 49.0                           | 33.8                            | 82.8                          |
| 2#                      | PUR                        | Quartz sand          | 43.7                           | 38.2                            | 81.9                          |
| 3                       | LOS                        | Quartz sand          | 16.9                           | 64.1                            | 81.0                          |
| 3#                      | LOS                        | Quartz sand          | 16.1                           | 55.0                            | 71.1                          |
| 4                       | BLK                        | HA-coated sand       | 82.8                           | 3.3                             | 86.0                          |
| 4#                      | BLK                        | HA-coated sand       | 85.1                           | 3.3                             | 88.4                          |
| 5                       | PUR                        | HA-coated sand       | 76.0                           | 9.8                             | 85.7                          |
| 5#                      | PUR                        | HA-coated sand       | 72.5                           | 9.5                             | 82.0                          |
| 6                       | LOS                        | HA-coated sand       | 51.3                           | 27.0                            | 78.3                          |
| 6#                      | LOS                        | HA-coated sand       | 47.6                           | 29.9                            | 77.6                          |
| 7                       | BLK                        | Goethite-coated sand | 8.8                            | 66.5                            | 75.3                          |
| 7#                      | BLK                        | Goethite-coated sand | 11.5                           | 63.7                            | 75.2                          |
| 8                       | PUR                        | Goethite-coated sand | 8.7                            | 77.2                            | 80.9                          |
| 8#                      | PUR                        | Goethite-coated sand | 6.9                            | 86.2                            | 93.1                          |
| 9                       | LOS                        | Goethite-coated sand | 0.6                            | 75.8                            | 76.4                          |
| 9#                      | LOS                        | Goethite-coated sand | 1.0                            | 78.4                            | 79.4                          |

<sup>a</sup> The symbol # indicates that the column is the replicate of the column indicated by the numerical number.

<sup>b</sup> Effluent mass was the percentage of BDE-209 passed through columns.

<sup>c</sup> Recovered mass was the percentage of BDE-209 recovered from columns.

<sup>d</sup> Mass balance was calculated as: effluent mass + recovered mass.

**Table S6.** Mineral compositions and contents (wt%) of the soil nanoparticles based on the semi-quantitative analysis of XRD patterns.

|     | Illite | IS <sup>a</sup> | Kaolinite | Quartz | Calcite | Hematite | Clinochlore | Albite |
|-----|--------|-----------------|-----------|--------|---------|----------|-------------|--------|
| BLK | 26.5   | 61.4            | 4.7       | 4.4    | 0.0     | 1.1      | 1.9         | 0.0    |
| PUR | 18.9   | 65.2            | 0.9       | 8.9    | 0.0     | 5.3      | 0.9         | 0.0    |
| LOS | 24.5   | 44.2            | 6.3       | 12.2   | 5.5     | 3.2      | 4.0         | 0.1    |

<sup>a</sup> Interstratified illite-smectite.

**Table S7.** Selected properties of coated sand.

| Type of porous media | Background solution | $\zeta$ potential (mV) | Specific surface area (m <sup>2</sup> /g) | Amount of coating |              |
|----------------------|---------------------|------------------------|-------------------------------------------|-------------------|--------------|
|                      |                     |                        |                                           | mg-C/g-sand       | mg-Fe/g-sand |
| Quartz sand          | GW, pH 7.5          | -19.8 ± 0.6            | 0.28 ± 0.02                               | ND                | ND           |
| HA-coated sand       | GW, pH 7.5          | -23.1 ± 0.4            | 0.36 ± 0.04                               | 1.40±0.24         | ND           |
| Goethite-coated sand | GW, pH 7.5          | -16.6 ± 0.5            | 0.79 ± 0.11                               | ND                | 1.58±0.12    |

ND represents “non-detection”.



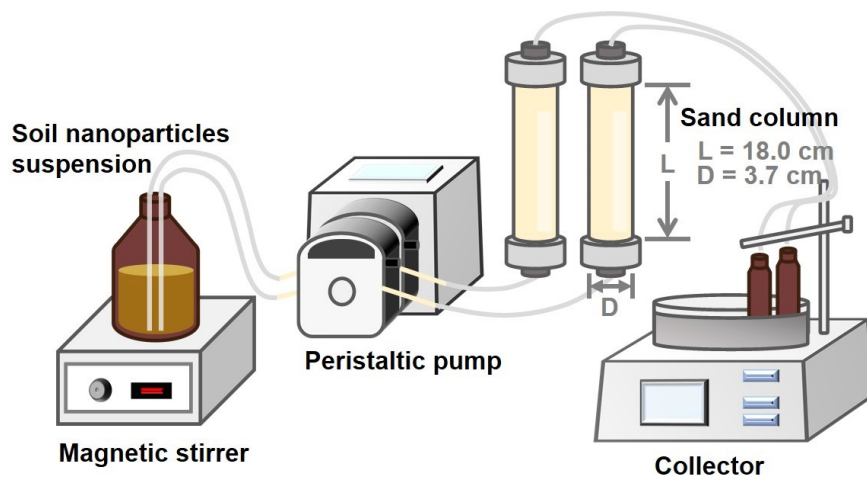

**Fig. S1.** Schematic diagram of column transport experiments.

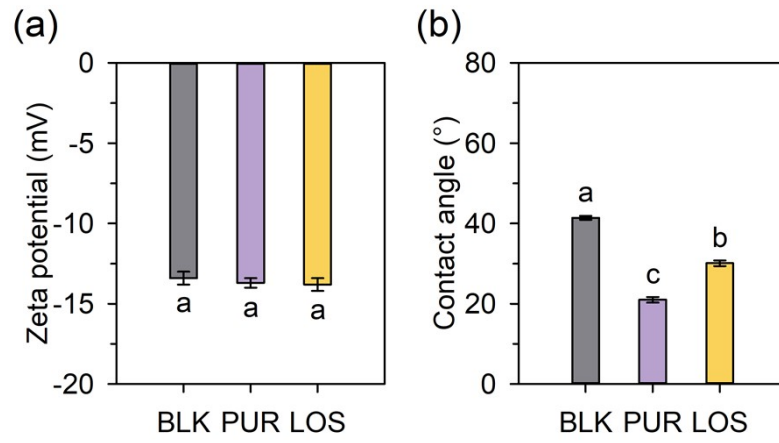

**Figure S2.** Selected properties of soil nanoparticles. (a)  $\zeta$  (Zeta) potential in artificial groundwater. (b) Water contact angle. Error bars indicate variations of duplicates.

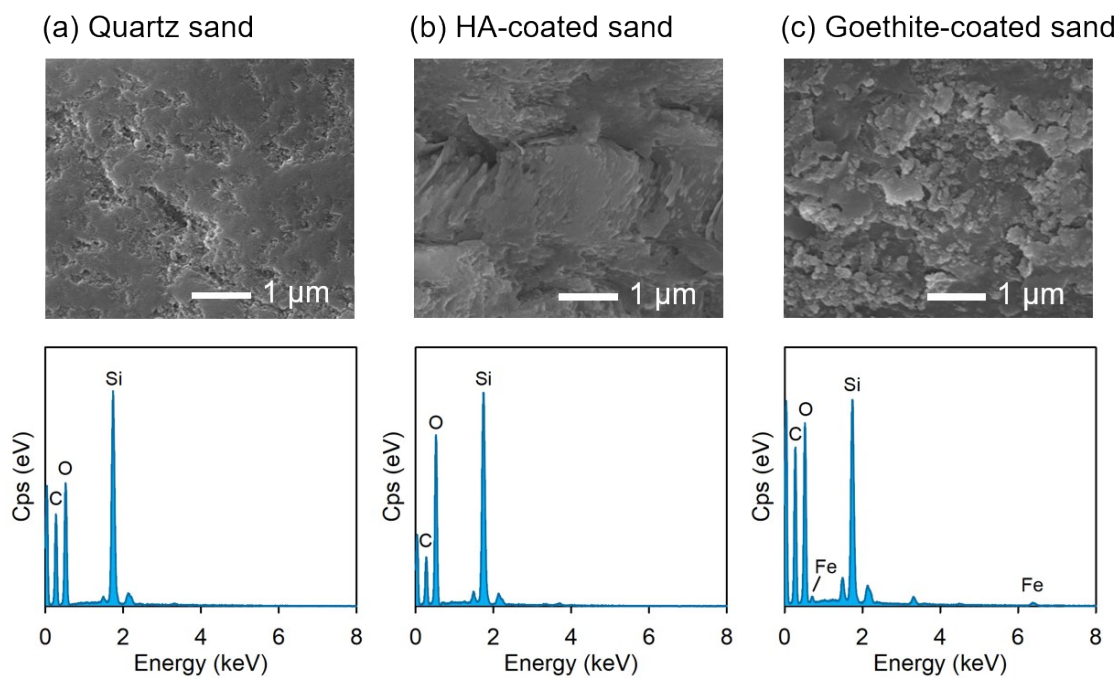

**Figure S3.** SEM image and energy dispersive X-ray spectrometry (EDS) spectra of different porous media. (a) Quartz sand, (b) Humic acid-coated sand, and (c) Goethite-coated sand.

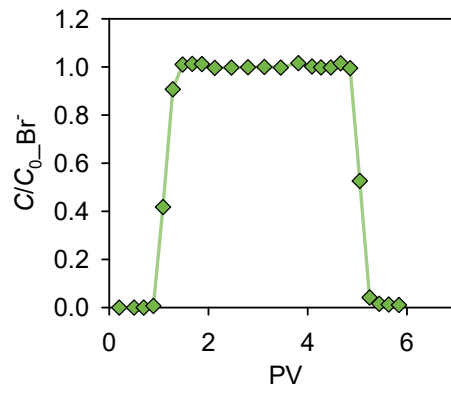

**Figure S4.** Representative breakthrough curve of conservative tracer (Br<sup>-</sup>).
